# Supplementary material for: Fungicide Resistance Evolving in Ramularia collo-cygni Population in Estonia
Source: MDPI journal article supplement (doi:10.3390/microorganisms9071514), 2021-07-15
Supplement: s1 [file s1]

Table S1. PCR primers used for fungicide target gene amplification.

| Target gene  | Primer name      | Primer sequence (5'-3')    | Reference |
|--------------|------------------|----------------------------|-----------|
| <i>Cytb</i>  | RCCcytoF         | GGATGATTAATACGTTACTTACACTC | [30]      |
|              | RCCcytoR         | GTTACCTGATCCTGCGCTGT       |           |
| <i>SdhB</i>  | SdhB_Rcc_Final_F | CAAATCACACACCATCCAGT       | [34]      |
|              | SdhB_Rcc_Final_R | CCAGCCCTCTTTACATCCTC       |           |
| <i>SdhC</i>  | SdhC_Rcc_Final_F | CACTCCAGCAAACCACGACC       | [34]      |
|              | SdhC_Rcc_Final_R | TAAAGCAGTTCTGTTGCTCT       |           |
| <i>CYP51</i> | KES2230          | CCTCCCTCCAACCATCCATTCC     | [33]      |
|              | KES2231          | ATCGCGGAGTGCATAAAAT        |           |
